# Supplementary material
Source: PubMed Central journal article supplement (PMC6479248)
Supplement: Supp_Fig2.pdf [file Supp_Fig2.pdf]

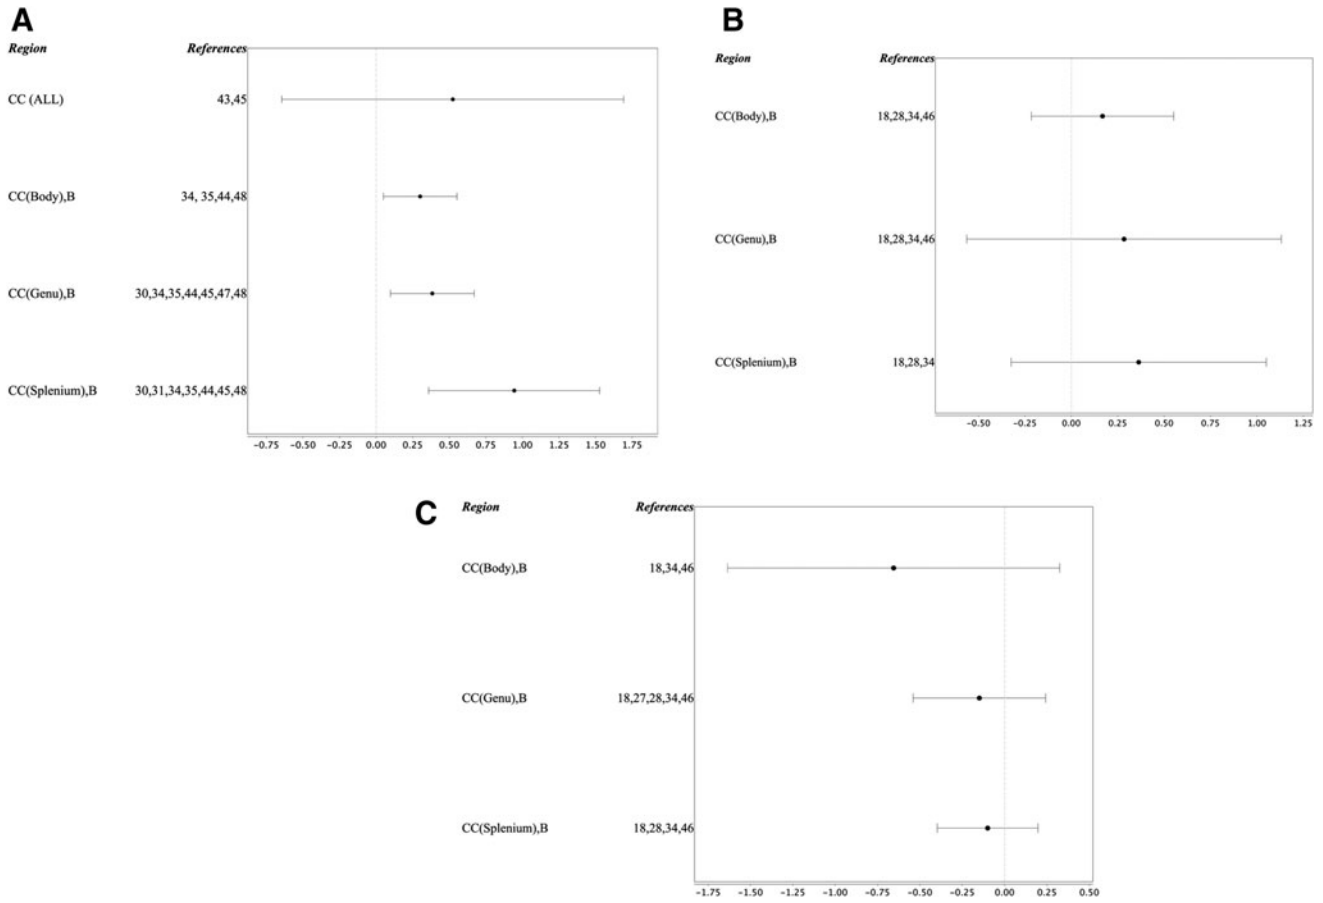

**SUPPLEMENTARY FIG. 2.** Hedges'  $g$  and 95% confidence interval in all (A) mean diffusivity/apparent diffusivity constant regions, (B) radial diffusivity regions, and (C) axial diffusivity regions. B, bilateral; CC, corpus callosum; L, left; R, right.
