# Supplementary material
Source: PubMed Central journal article supplement (PMC6479248)
Supplement: Supp_Table2.pdf [file Supp_Table2.pdf]

SUPPLEMENTARY TABLE S2. JACKKNIFE SENSITIVITY ANALYSIS OR ROI META-ANALYSIS

| Study                                 | 1 | 2 | 3 | 4 | 5 | 6 | 7 | 8 | 9 | 10 | 11 | 12 | 13 | 14 | 15 | 16 | 17 | 18 | 19 |
|---------------------------------------|---|---|---|---|---|---|---|---|---|----|----|----|----|----|----|----|----|----|----|
| FA: TBI < controls                    |   |   |   |   |   |   |   |   |   |    |    |    |    |    |    |    |    |    |    |
| Posterior internal capsule, right     | X | X | X | X |   |   |   |   |   |    | X  | X  |    |    |    |    |    |    |    |
| Posterior internal capsule, bilateral |   |   |   |   |   |   |   |   |   |    |    |    | X  |    |    |    | X  |    |    |
| Posterior internal capsule, left      | X | X | X | X |   |   |   |   |   |    | X  | X  |    |    |    |    |    |    |    |
| Splenium, bilateral                   |   |   | X | X | X |   | X | X | X | X  |    |    |    | X  | X  | X  | X  | X  | X  |
| Anterior internal capsule, right      | X | X | X |   |   |   |   |   |   |    | X  | X  |    |    |    |    |    |    |    |
| Posterior thalamic radiations, left   | X |   |   |   |   |   |   |   |   |    |    | X  | X  |    |    |    |    |    |    |
| MD/ADC: TBI > controls                |   |   |   |   |   |   |   |   |   |    |    |    |    |    |    |    |    |    |    |
| Splenium of CC, bilateral             |   |   |   | X | X |   | X | X |   |    |    |    |    |    | X  | X  |    |    | X  |
| Genu of CC, bilateral                 |   |   |   |   | X |   | X | X |   |    |    |    |    | X  | X  |    |    | X  | X  |
| Body of CC, bilateral                 |   |   |   |   |   |   |   | X |   |    |    |    |    | X  |    |    |    |    | X  |

1, Adam<sup>19</sup>; 2, Arfanakis<sup>25</sup>; 3, Clark<sup>28</sup>; 4, Grossman<sup>31</sup>; 5, Inglese<sup>30</sup>; 6, Kraus<sup>33</sup>; 7, Kumar<sup>34</sup>; 8, Lange<sup>35</sup>; 9, Ling<sup>18</sup>; 10, Little<sup>37</sup>; 11, Mac Donald (2011)<sup>39</sup>; 12, Mac Donald (2017)<sup>20</sup>; 13, Maruta<sup>40</sup>; 14, Matsushita<sup>41</sup>; 15, Rutgers<sup>44</sup>; 16, Singh<sup>45</sup>; 17, Sorg<sup>46</sup>; 18, Wilde<sup>47</sup>; 19, Zhang<sup>48</sup>.

An "X" indicates that the results remained significant when the study was removed from analysis. A shaded black box indicates that study was not included in primary analysis.

ROI, region of interest; FA, fractional anisotropy; TBI, traumatic brain injury; MD, mean diffusivity; ADC, apparent diffusion coefficient; CC, corpus callosum.
