# Supplementary material
Source: PubMed Central journal article supplement (PMC6479248)
Supplement: Supp_Table3.pdf [file Supp_Table3.pdf]

SUPPLEMENTARY TABLE S3. JACKKNIFE SENSITIVITY ANALYSIS FOR VOXEL-WISE META-ANALYSIS

| <i>Study</i>                                | <i>1</i> | <i>2</i> | <i>3</i> | <i>4</i> | <i>5</i> | <i>6</i> | <i>7</i> | <i>8</i> | <i>9</i> | <i>10</i> | <i>11</i> |   |
|---------------------------------------------|----------|----------|----------|----------|----------|----------|----------|----------|----------|-----------|-----------|---|
| FA: TBI > controls                          |          |          |          |          |          |          |          |          |          |           |           |   |
| Superior longitudinal fasciculus III, right |          | X        | X        | X        | X        | X        | X        | X        | X        | X         |           |   |
| FA: TBI < controls                          |          |          |          |          |          |          |          |          |          |           |           |   |
| Corpus callosum                             |          | X        | X        | X        | X        | X        | X        | X        | X        |           |           |   |
| Corpus callosum                             | X        | X        | X        | X        | X        | X        | X        | X        |          |           | X         |   |
| Superior longitudinal fasciculus III, right | X        | X        | X        | X        | X        | X        | X        | X        |          |           |           |   |
| Corpus callosum                             | X        | X        | X        | X        | X        | X        | X        | X        |          |           | X         |   |
| Corpus callosum                             |          | X        | X        | X        | X        | X        | X        | X        | X        |           |           |   |
| Inferior fronto-occipital fasciculus, right | X        | X        | X        | X        | X        | X        | X        | X        | X        |           |           |   |
| Insula, right                               |          | X        | X        | X        | X        | X        | X        | X        |          |           | X         |   |
| MD: TBI < controls                          |          |          |          |          |          |          |          |          |          |           |           |   |
| Inferior longitudinal fasciculus, right     |          |          |          |          |          |          | X        |          |          |           |           | X |

1, Asano<sup>4</sup>; 2, Costanzo<sup>50</sup>; 3, Dean<sup>21</sup>; 4, Ling<sup>18</sup>; 5, Lipton<sup>51</sup>; 6, Messe<sup>22</sup>; 6, Sasaki<sup>23</sup>; 8, Smits<sup>52</sup>; 9, Wada<sup>53</sup>; 10, Zhu<sup>54</sup>; 11, Veeramuthu<sup>24</sup>.

An "X" indicates that the results remained significant when the study was removed from analysis. A shaded black box indicates that study was not included in primary analysis.

FA, fractional anisotropy; TBI, traumatic brain injury; MD, mean diffusivity.
