# Supplementary material
Source: PubMed Central journal article supplement (PMC6479248)
Supplement: Supp_Table4.pdf [file Supp_Table4.pdf]

SUPPLEMENTARY TABLE S4. RESULTS OF VW META-ANALYSES FOR ONLY MILD TBI SUBGROUP

| <i>Region</i>                               | <i>Z value</i> | <i>p value</i> | <i>Cluster size</i> | <i>MNI coordinates</i> |
|---------------------------------------------|----------------|----------------|---------------------|------------------------|
| FA: TBI < controls                          |                |                |                     |                        |
| Corpus callosum                             | -1.465         | 0.000508606    | 341                 | -2, -24, 18            |
| Superior longitudinal fasciculus III, right | -1.677         | 0.000091314    | 190                 | 34, -6, 18             |
| Corpus callosum                             | -1.463         | 0.000528157    | 92                  | -14, 44, 26            |
| Inferior fronto-occipital fasciculus, right | -1.45          | 0.000639021    | 90                  | 34, -60, 6             |
| Insula, right                               | -1.507         | 0.000423849    | 35                  | 44, -2, 6              |
| Olfactory cortex, BA 25, right              | -1.244         | 0.002725601    | 18                  | 12, 16, -18            |
| MD: TBI > controls                          |                |                |                     |                        |
| Inferior longitudinal fasciculus, right     | 1.393          | 0.000006497    | 435                 | 30, -58, 2             |

Results thresholded at  $p < 0.005$  and cluster size  $> 10$  voxels.

VW, voxel-wise; TBI, traumatic brain injury; MNI, Montreal Neurological Institute; FA, fractional anisotropy; BA, Brodmann Area; MD, mean diffusivity.
