# Supplementary material
Source: PubMed Central journal article supplement (PMC6479248)
Supplement: Supp_Table5.pdf [file Supp_Table5.pdf]

SUPPLEMENTARY TABLE S5. RESULTS OF VW META-ANALYSES FOR ONLY <3 MONTHS SINCE INJURY TBI SUBGROUP

| <i>Region</i>                               | <i>Z value</i> | <i>p value</i> | <i>Cluster size</i> | <i>MNI coordinates</i> |
|---------------------------------------------|----------------|----------------|---------------------|------------------------|
| FA: TBI < controls                          |                |                |                     |                        |
| Corpus callosum                             | -1.613         | 0.00021517     | 378                 | -6, -14, 22            |
| Superior longitudinal fasciculus III, right | -1.781         | ~0             | 229                 | 36, -4, 18             |
| Corpus callosum                             | -1.491         | 0.00068468     | 104                 | -20, 38, 26            |
| Median network, cingulum, left              | -1.482         | 0.00078249     | 60                  | -12, -60, 40           |

Results thresholded at  $p < 0.005$  and cluster size  $> 10$  voxels.

VW, voxel-wise; TBI, traumatic brain injury; MNI, Montreal Neurological Institute; FA, fractional anisotropy.
