# Supplementary material
Source: PubMed Central journal article supplement (PMC6479248)
Supplement: Supp_Table6.pdf [file Supp_Table6.pdf]

SUPPLEMENTARY TABLE S6. RESULTS OF VW META-ANALYSES FOR ONLY  $\geq 3$  MONTH SINCE INJURY TBI SUBGROUP

| <i>Region</i>                                                | <i>Z value</i> | <i>p value</i> | <i>Cluster size</i> | <i>MNI coordinates</i> |
|--------------------------------------------------------------|----------------|----------------|---------------------|------------------------|
| FA: TBI > controls                                           |                |                |                     |                        |
| Superior longitudinal fasciculus III, right                  | 1.263          | 0.000006497    | 785                 | 44, -16, 24            |
| FA: TBI < controls                                           |                |                |                     |                        |
| Corpus callosum                                              | -1.513         | 0.000332534    | 123                 | 22, -40, 10            |
| (undefined)                                                  | -1.526         | 0.000286877    | 63                  | 8, 0, 2                |
| Corpus callosum                                              | -1.261         | 0.001793146    | 49                  | 14, 20, 24             |
| Left anterior thalamic projections                           | -1.264         | 0.001695335    | 41                  | -18, 8, 22             |
| Right cortico-spinal projections                             | -1.264         | 0.001695335    | 39                  | 24, -6, 40             |
| Right inferior network, inferior fronto-occipital fasciculus | -1.394         | 0.000860691    | 24                  | 34, -60, 6             |
| Corpus callosum                                              | -1.262         | 0.00179315     | 24                  | -16, -38, 24           |
| Corpus callosum                                              | -1.263         | 0.00169533     | 19                  | -22, -36, 38           |
| Right caudate nucleus, BA 25                                 | -1.263         | 0.00169533     | 16                  | 12, 22, 2              |
| Left superior longitudinal fasciculus III                    | -1.262         | 0.00175404     | 16                  | -44, -38, 30           |
| Corpus callosum                                              | -1.262         | 0.00175404     | 15                  | -22, -24, 32           |
| Corpus callosum                                              | -1.257         | 0.00216484     | 15                  | 6, -8, 22              |
| Right superior longitudinal fasciculus II                    | -1.261         | 0.00186491     | 14                  | 32, 16, 34             |
| Right supramarginal gyrus, BA 2                              | -1.264         | 0.00169533     | 14                  | 60, -30, 32            |
| Left inferior network, inferior longitudinal fasciculus      | -1.26          | 0.00186491     | 12                  | -42, -30, -10          |

VW, voxel-wise; TBI, traumatic brain injury; MNI, Montreal Neurological Institute; FA, fractional anisotropy; BA, Brodmann Area.
