# Supplementary material
Source: PubMed Central journal article supplement (PMC6479248)
Supplement: Supp_Table7.pdf [file Supp_Table7.pdf]

SUPPLEMENTARY TABLE S7. EGGERS TEST PUBLICATIONS  
BIAS IN REGIONS OF SIGNIFICANT DIFFERENCE IDENTIFIED  
IN PRIMARY ROI META-ANALYSES

| <i>Region</i>                                                               | <i>p value</i> |
|-----------------------------------------------------------------------------|----------------|
| FA: TBI < controls                                                          |                |
| Posterior internal capsule, right                                           | 0.29           |
| Centrum semiovale                                                           |                |
| Posterior internal capsule, bilateral                                       | 0.44           |
| Posterior internal capsule, left                                            | 0.09           |
| Splenium, bilateral                                                         | 0.14           |
| Anterior internal capsule, right                                            | 0.98           |
| Posterior corona radiata, left                                              |                |
| Posterior corona radiata, right                                             |                |
| Posterior thalamic radiations, left                                         | 0.28           |
| Anterior corona radiata, bilateral                                          |                |
| Posterior corona radiata, bilateral                                         |                |
| MD/ADC: TBI > controls                                                      |                |
| Splenium of CC, bilateral                                                   | 0.26           |
| Body of CC, bilateral                                                       | 0.53           |
| Genu of CC, bilateral                                                       | 0.09           |
| A shaded black box indicates that analysis was not done because <2 studies. |                |

ROI, region of interest; FA, fractional anisotropy; TBI, traumatic brain injury; MD, mean diffusivity; ADC, apparent diffusion coefficient; CC, corpus callosum.
